# Supplementary material
Source: Research Square preprint supplement (doi:10.21203/rs.3.rs-9681857/v1)
Supplement: Supplementary file 1 [file d383922327db9b0dc5da26d1.docx]

**Heavy Metals Contamination and Associated Health Risks: Consumer Perceptions and Policy Implications in the Mining City of Lubumbashi, DR Congo**

Adam Salifu1, Jonas Lwalaba Wa Lwalaba2 and Arsene Mushagalusa Balasha3

Supplementary file

Table S1. Sampled vegetable species and their common names from the six markets in Lubumbashi.

Table S2. knowledge, perception, and practices of consumers with respect to heavy metal contamination in vegetables

Table S3. Ordinal logistic regression analysis of factors influencing the perception level of consumers.

Figure S1. Consumers most preferred the vegetable species

Table S1. Sampled vegetable species and their common names from the six markets in Lubumbashi.

| **Vegetable species** | **English/French** | **Family** | **Swahili name** | **Edible parts** | **Mode of preparation** | **Photo** |
| --- | --- | --- | --- | --- | --- | --- |
| *Spinacia oleacera* | Spinach/Epinards | Amaranthaceae | Mchicha | Leaves | Boiled with condiments | 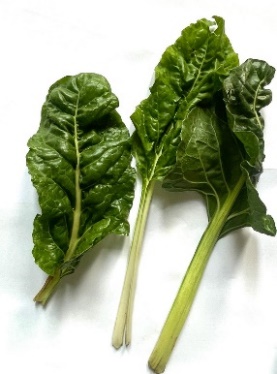 |
| *Brassica chinensis* | Chinese cabbage/  chou chinois | Brassicaceae | Kabichi ya majani | Leaves | Boiled with condiments | 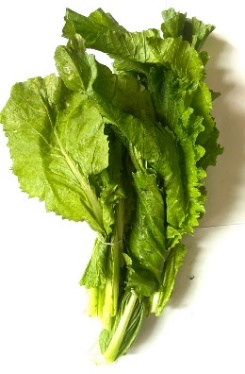 |
| *Amaranthus vulgaris* | Amaranth/Amaranthe | Amaranthaceae | Lenga lenga | Leaves | Boiled with condiments | 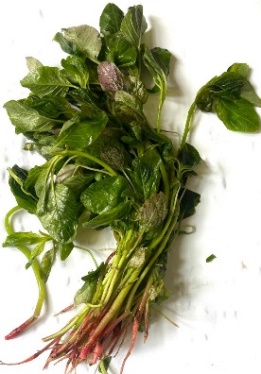 |
| *Manihot esculenta* | Cassava/Manioc | Euphorbiaceae | Sombe | Leaves/tubers  Leaves sampled for present study | Boil to cook with condiments | 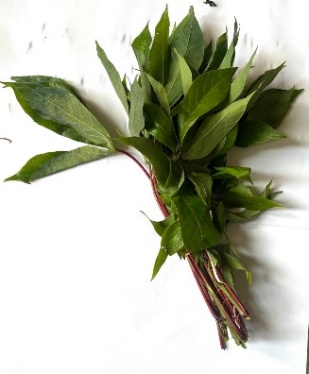 |
| *Allium cepa* | Onion/Oignon | Liliaceae | Kitungulu | Bulbs/leaves | In salads, in soups as condiments | 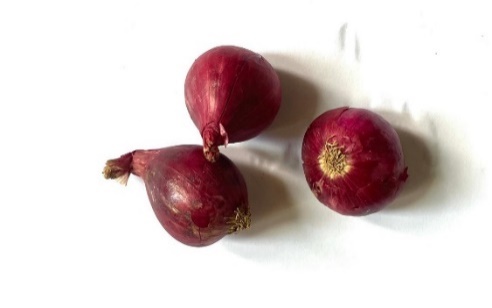 |
| *Solanum lycopersicum* | Tomato/tomate | Solanaceae | Nyanya | Fruits | Ripe raw in salads, as a condiment in soups | 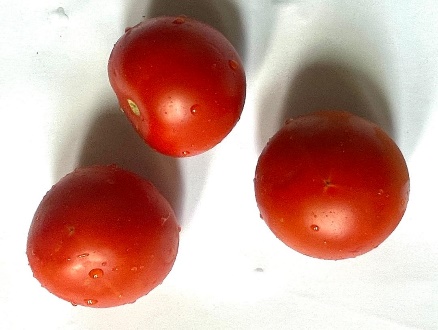 |


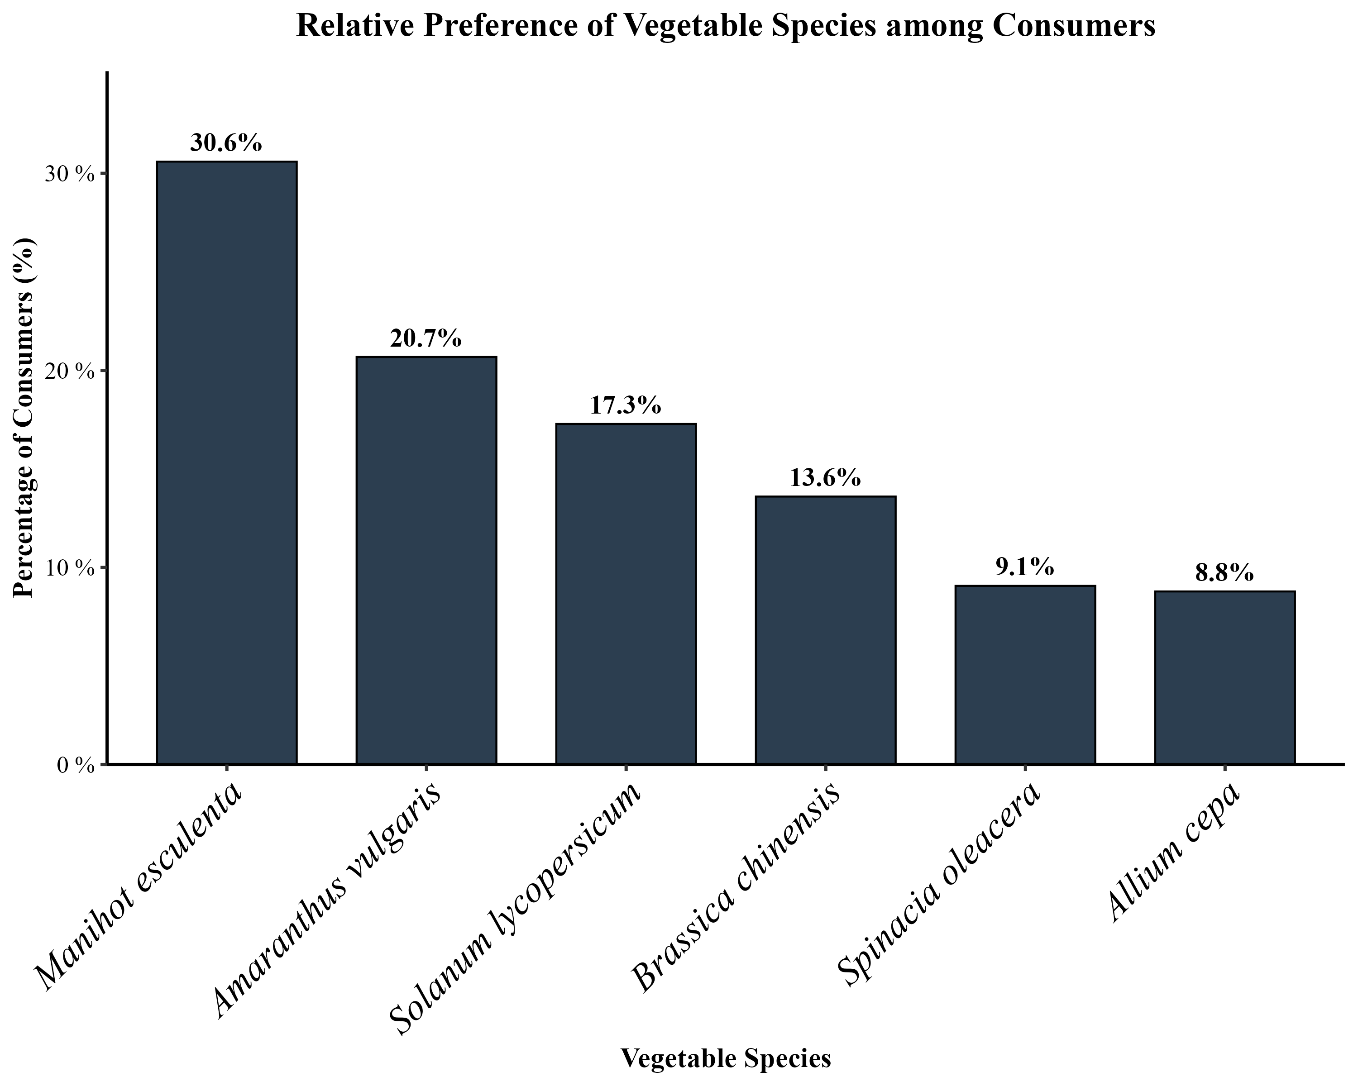


Figure S1. Consumers most preferred vegetable species

Table S2. knowledge, perception, and practices of consumers with respect to heavy metal contamination in vegetables

| Variables |  |  |
| --- | --- | --- |
| **Knowledge** | **Responses** | **N (%)** |
| 1. Being in a mining city, are you aware that vegetables can absorb heavy metals (such as lead, copper, cobalt) from polluted soil or water? | Yes | 236 (66.9) |
| No | 31 (8.78) |
| I don’t know | 86 (24.4) |
| 2. What do you think are possible sources of vegetable contamination in Lubumbashi? | Mining activities | 163 (46.2) |
| Industrial waste | 130 (36.8) |
| Road traffic/dust | 21(5.95) |
| Use of pesticides | 8 (2.27) |
| I don’t know | 31(8.78) |
| 3. Do you know if the vegetables sold in your market are grown near mining areas or industrial sites? | Yes | 106 (30.0) |
| No | 101(28.6) |
| I do not know | 146 (41.4) |
| **Perception** |  |  |
| 4. Consuming vegetables contaminated with heavy metals can cause serious health problems. | Strongly agree | 260 (73.6 ) |
| Agree | 47 (13.3) |
| Disagree | 15 (4.25) |
| Not sure | 31 (8.78) |
| 5. Which health problems do you associate with heavy metal contamination in food? | Stomach pains/diarrhea | 175 (49.6) |
| Cancer | 74 (21.0) |
| Kidney/liver problems | 39 (11.0) |
| Developmental issues in children | 32 (9.07) |
| I do not know | 33 (9.35) |
| 6. Do you think washing or cooking can completely remove heavy metals from vegetables? | Yes | 172 (48.7) |
| No | 98 (27.8) |
| Not sure | 83 (23.5) |
| **Practices** |  |  |
| 7. When buying vegetables, do you consider the place of cultivation before purchasing? | Always | 74 (20.96) |
| Sometimes | 109 (30.88) |
| Rarely | 92 (26.06) |
| Never | 78 (22.10) |
| 8. If you know vegetables come from a polluted area, would you avoid buying them? | Yes | 234 (66.29) |
| No | 70 (19.83) |
| I don’t know | 49 (13.83) |
| 9. Since vegetables are exposed to pollutants (heavy metals, pesticides), did this affect your vegetable washing pattern? | Very much | 255 (72.24) |
| A little | 60 (17.0) |
| Not at all | 38 (10.76) |
| 10. How many times do you wash? | 1-2 times | 130 (36.83) |
| 3-4 times | 201(56.94) |
| ≥5 times | 22 (6.23) |

Table S3. Ordinal logistic regression analysis of factors influencing the perception level of consumers.

| **Predictors** |  | **Knowledge** | | | **Perception** | | | **Practice** | | |
| --- | --- | --- | --- | --- | --- | --- | --- | --- | --- | --- |
| **Variables** | **Ref** | **ORa** | **95% CI** | **P-value** | **ORa** | **95% CI** | **P-value** | **ORa** | **95% CI** | **P-value** |
| Gender | Female | 1.91 | 1.28-2.86 | 0.002⁎ | 0.81 | 0.54-1.21 | 0.307 | 1.25 | 0.84-1.85 | 0.274 |
| Age (years) | 30-44 | 1.17 | 0.73-1.87 | 0.517 | 1.5 | 0.96-2.49 | 0.072 | 1.24 | 0.78-1.97 | 0.363 |
| 45-59 | 0.48 | 0.19-1.24 | 0.131 | 1.78 | 0.75-4.22 | 0.191 | 2.33 | 0.91-5.95 | 0.077 |
| ≥60 | 0.07 | 0.01-0.45 | 0.005⁎ | 0.76 | 0.10-5.60 | 0.789 | 0.30 | 0.05-1.70 | 0.175 |
| Education level | Primary | 0.05 | 0.01-0.30 | 0.001⁎ | 0.19 | 0.03-1.07 | 0.059 | 0.28 | 0.05-1.45 | 0.13 |
| Secondary | 0.25 | 0.05-1.23 | 0.088 | 0.39 | 0.09-1.61 | 0.192 | 0.43 | 0.10-1.77 | 0.242 |
| University | 0.15 | 0.03-0.72 | 0.018 | 0.35 | 0.09-1.38 | 0.133 | 0.31 | 0.08-1.23 | 0.095 |
| Main occupation | Government worker | 2.34 | 0.95-5.81 | 0.066 | 1.35 | 0.58-3.15 | 0.491 | 3.34 | 1.35-8.25 | 0.009⁎ |
| Private sector | 1.82 | 0.86-3.85 | 0.116 | 0.81 | 0.40-1.67 | 0.574 | 2.98 | 1.40-6.33 | 0.005⁎ |
| Student | 2.15 | 0.99-4.68 | 0.054 | 1.44 | 0.67-3.08 | 0.348 | 3.87 | 1.75-8.57 | 0.001⁎ |
| Unemployed | 2.28 | 0.86-6.04 | 0.096 | 1.04 | 0.40-2.71 | 0.936 | 5.58 | 2.16-14.39 | 0.000⁎⁎ |
| Length of stay in Lubumbashi (years) | 6-10 | 0.57 | 0.32-1.02 | 0.058 | 0.56 | 0.31-1.02 | 0.056 | 0.99 | 0.55-1.79 | 0.982 |
| 10 > years | 0.55 | 0.34-0.91 | 0.02⁎ | 0.86 | 0.52-1.44 | 0.576 | 0.87 | 0.53-1.43 | 0.586 |
| Have heard about heavy metal contamination before | No | 7.22 | 4.34-12.02 | 0.000⁎⁎ | 3.87 | 2.38-6.29 | 0.000⁎⁎ | 2.20 | 1.37-3.55 | 0.001⁎ |

Significant at *<0.05; **<0.001; CI confidence interval; ORa adjusted odds ratio, ref reference
